# Supplementary material for: Binding of Superantigen Toxins into the CD28 Homodimer Interface Is Essential for Induction of Cytokine Genes That Mediate Lethal Shock
Source: PubMed Central journal article supplement (PMC3172200; doi:10.1371/journal.pbio.1001149), 2011-09-13

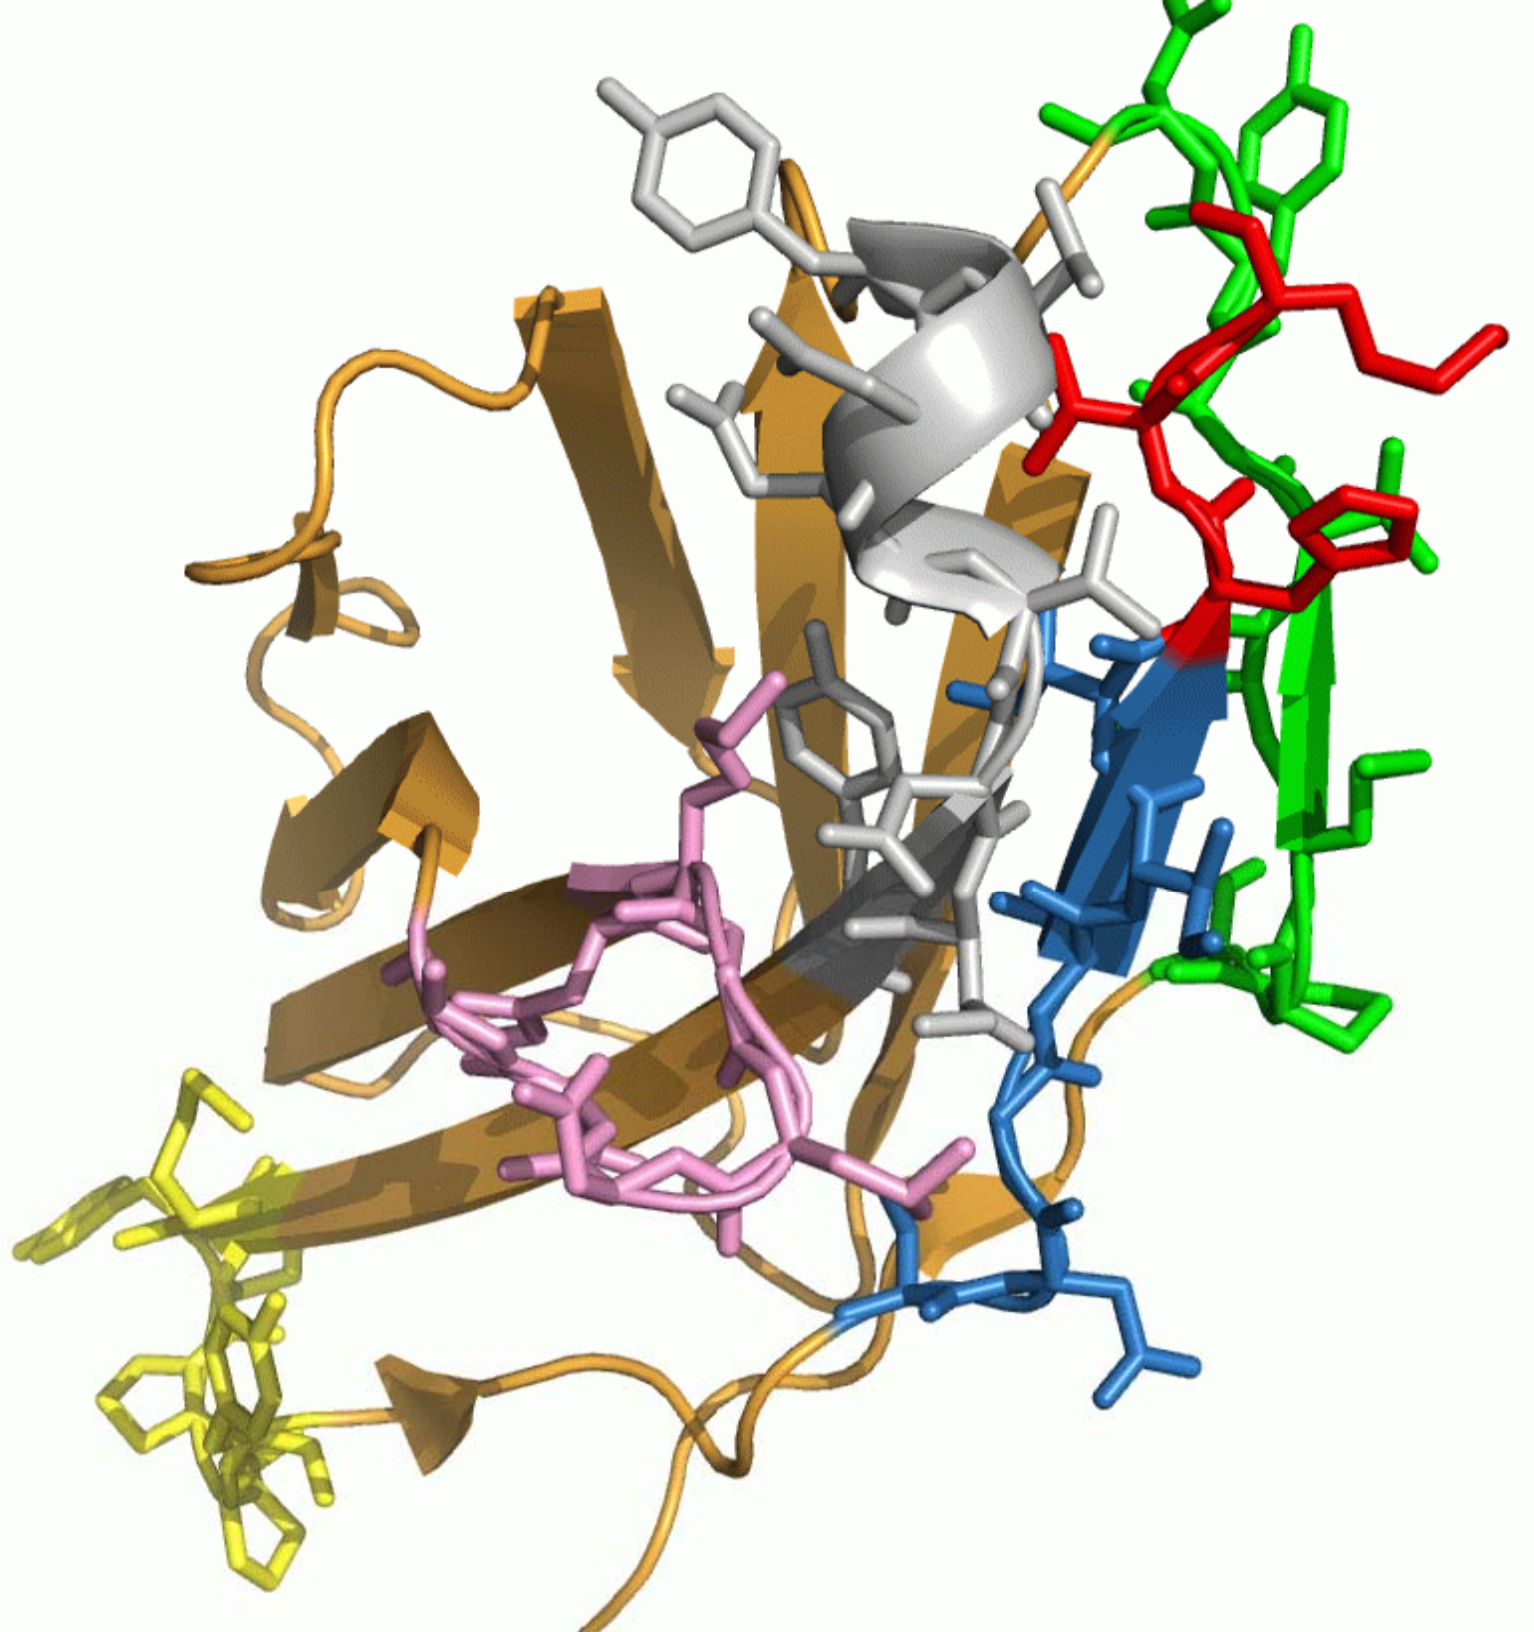

Supplement: pbio.1001149.s004.pdf [file pbio.1001149.s004.pdf]
