# Supplementary material for: Binding of Superantigen Toxins into the CD28 Homodimer Interface Is Essential for Induction of Cytokine Genes That Mediate Lethal Shock
Source: PubMed Central journal article supplement (PMC3172200; doi:10.1371/journal.pbio.1001149), 2011-09-13
Supplement: pbio.1001149.s005.pdf [file pbio.1001149.s005.pdf]

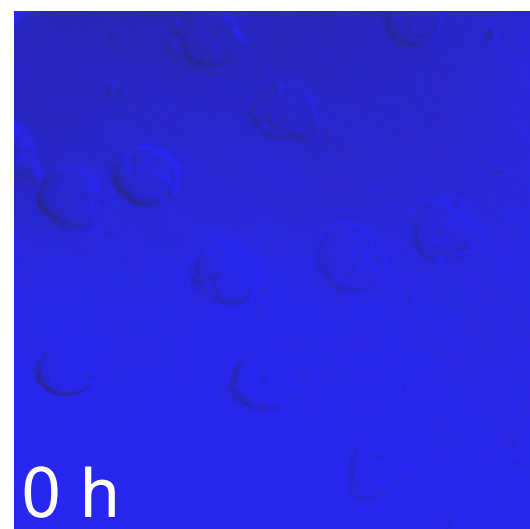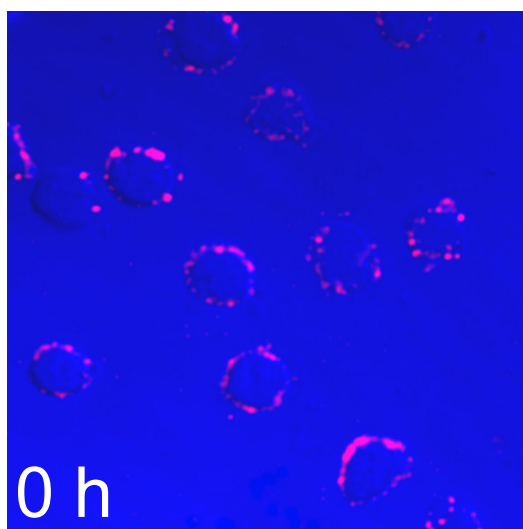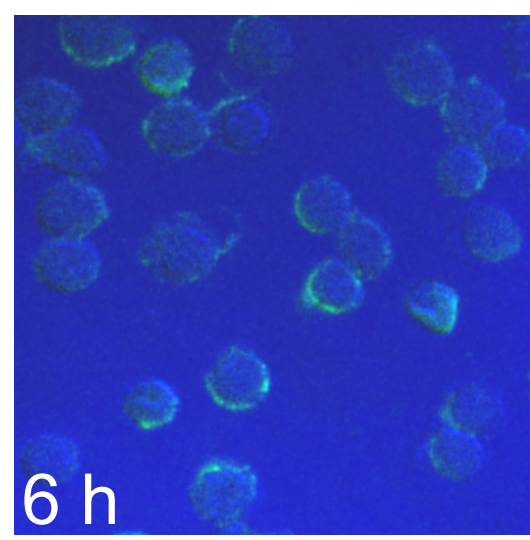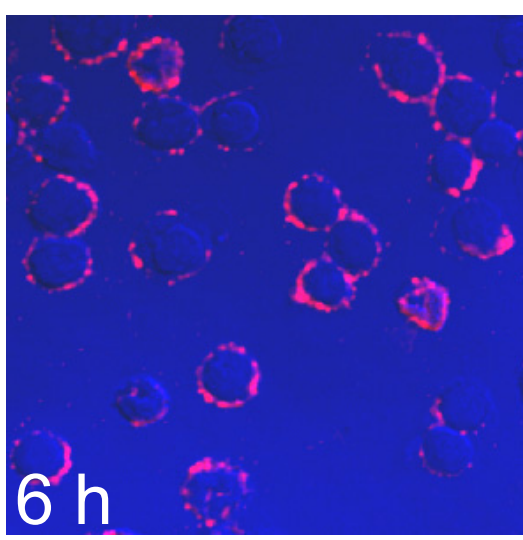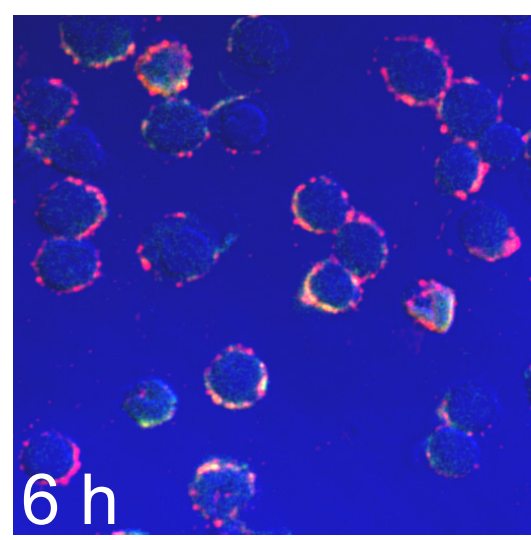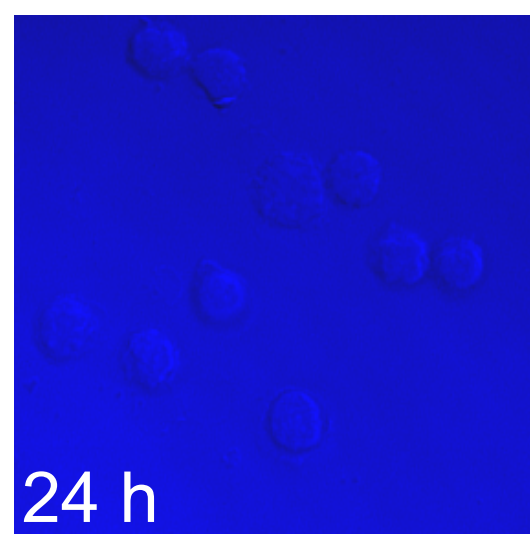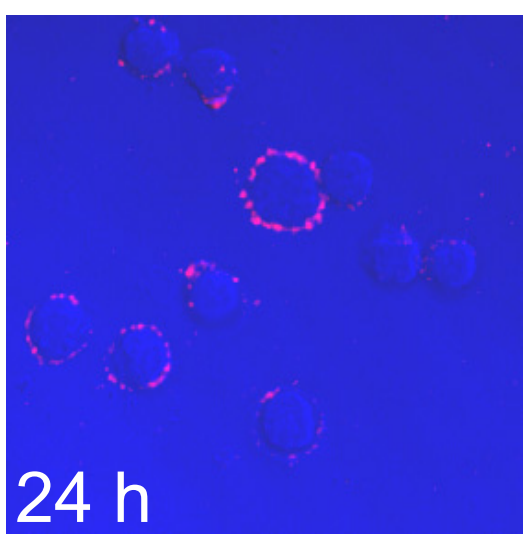

Merge

$\alpha$ CD28 mAb

CD28 Ab
