# Supplementary material for: Binding of Superantigen Toxins into the CD28 Homodimer Interface Is Essential for Induction of Cytokine Genes That Mediate Lethal Shock
Source: PubMed Central journal article supplement (PMC3172200; doi:10.1371/journal.pbio.1001149), 2011-09-13
Supplement: pbio.1001149.s007.pdf [file pbio.1001149.s007.pdf]

**Table S1** Kinetic parameters of surface plasmon resonance analysis in Figure 5.

| Panel    | Ligand | Analyte | $k_a$ (1/Ms) | SEM ( $k_a$ ) | % SEM ( $k_a$ )/ $k_a$ | $k_d$ (1/s) | SEM ( $k_d$ ) | % SEM ( $k_d$ )/ $k_d$ | KD ( $\mu$ M) | $\chi^2$ |
|----------|--------|---------|--------------|---------------|------------------------|-------------|---------------|------------------------|---------------|----------|
| <b>b</b> | CD28   | SEB     | 320          | 3.78          | 1.18                   | 7.28E-04    | 9.57E-06      | 1.31                   | 2.28          | 1.28     |
| <b>c</b> | p1TA   | SEB     | 1,680        | 51.10         | 3.04                   | 8.19E-04    | 1.35E-05      | 1.65                   | 0.49          | 0.22     |
| <b>d</b> | p2TA   | SEB     | 279          | 6.64          | 2.37                   | 7.87E-04    | 1.18E-05      | 1.50                   | 2.82          | 0.68     |
| <b>f</b> | p1TA   | SEA     | 7,250        | 427.00        | 5.89                   | 3.68E-03    | 5.89E-05      | 1.60                   | 0.51          | 0.92     |
| <b>g</b> | p2TA   | SEA     | 523          | 13.60         | 2.60                   | 3.33E-04    | 4.50E-06      | 1.35                   | 0.64          | 0.42     |

Purified recombinant superantigens were used.  $k_a$ , association rate;  $k_d$ , dissociation rate; KD, dissociation constant; Ms, millisecond; SEM,  $n=3$ .
