# Supplementary material for: Binding of Superantigen Toxins into the CD28 Homodimer Interface Is Essential for Induction of Cytokine Genes That Mediate Lethal Shock
Source: PubMed Central journal article supplement (PMC3172200; doi:10.1371/journal.pbio.1001149), 2011-09-13
Supplement: pbio.1001149.s008.pdf [file pbio.1001149.s008.pdf]

**Table S2** Kinetic parameters of surface plasmon resonance analysis in Figure 6.

| Ligand | Analyte    | $k_a$ (1/Ms) | SEM ( $k_a$ ) | % SEM ( $k_a$ )/ $k_a$ | $k_d$ (1/s) | SEM ( $k_d$ ) | % SEM ( $k_d$ )/ $k_d$ | KD ( $\mu$ M) | $\chi^2$ |
|--------|------------|--------------|---------------|------------------------|-------------|---------------|------------------------|---------------|----------|
| CD28   | <i>wt</i>  | 603          | 2.69          | 0.43                   | 9.87E-04    | 2.37E-05      | 2.40                   | 1.64          | 1.34     |
| CD28   | <i>tk2</i> | 757,000      | 18,400        | 2.43                   | 4.74E-03    | 8.47E-05      | 1.78                   | 6.3E-03       | 1.32     |
| p17A   | <i>tk2</i> | 1,300,000    | 16,500        | 1.27                   | 6.54E-04    | 3.41E-05      | 5.21                   | 5.0E-04       | 0.49     |
| p27A   | <i>tk2</i> | 1,200,000    | 13,900        | 1.16                   | 5.38E-04    | 8.2E-05       | 15.24                  | 4.5E-04       | 1.91     |

Purified recombinant superantigens were used.  $k_a$ , association rate;  $k_d$ , dissociation rate; KD, dissociation constant; Ms, millisecond; SEM,  $n=3$ .
